# Supplementary material for: Long-Term Exposure to Ambient PM2.5, Sunlight, and Obesity: A Nationwide Study in China
Source: PubMed Central journal article supplement (PMC8777285; doi:10.3389/fendo.2021.790294), 2022-01-07

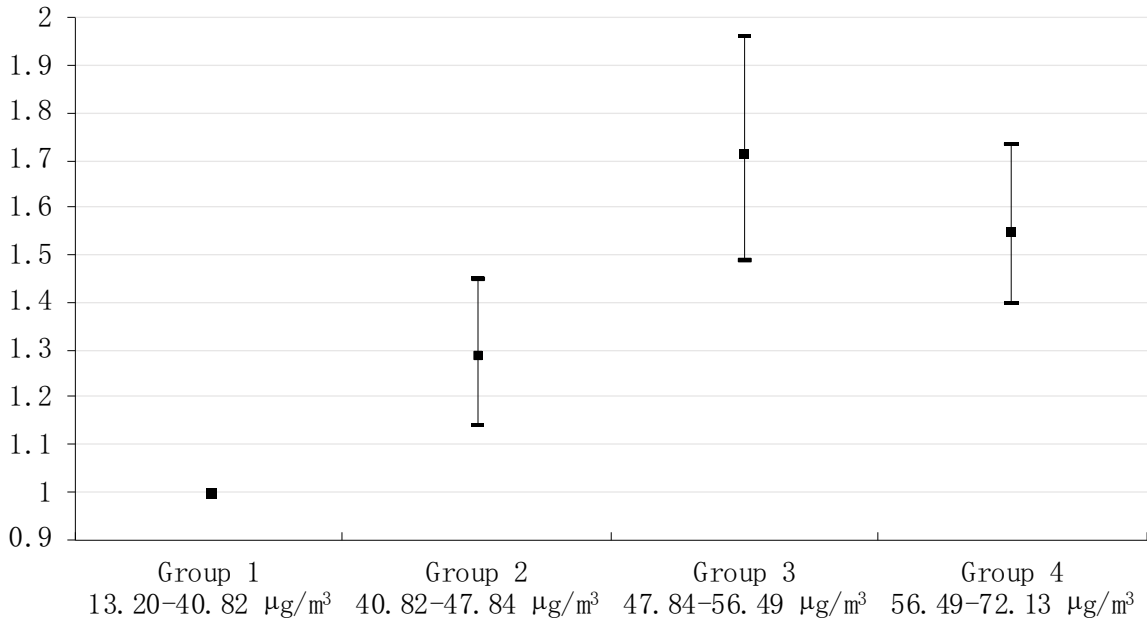

Supplement: Image_2.pdf [file Image_2.pdf]
